# Supplementary material for: Skin microbiota diversity among genetically unrelated individuals of Indian origin
Source: PeerJ. 2022 Mar 16;10:e13075. doi: 10.7717/peerj.13075 (PMC8934042; doi:10.7717/peerj.13075)
Supplement: Supplemental Information 2 — List of bacterial taxonomic classification based on obtained sequences with respect to Operational Taxonomic Unit (OTUs). [file peerj-10-13075-s002.xlsx]

## Sheet: sheet1
OTUU	kingdom	phylum	class	order	family	genus
OTU1	Bacteria	Firmicutes	Bacilli	Lactobacillales	Aerococcaceae	Abiotrophia
OTU2	Bacteria	Firmicutes	Bacilli	Bacillales	Staphylococcaceae	Abyssicoccus
OTU7	Bacteria	Firmicutes	Clostridia	Clostridiales	Eubacteriaceae	Acetobacterium
OTU9	Bacteria	Firmicutes	Negativicutes	Selenomonadales	Sporomusaceae	Acetonema
OTU10	Bacteria	Firmicutes	Mollicutes	Acholeplasmatales	Acholeplasmataceae	Acholeplasma
OTU12	Bacteria	Proteobacteria	Betaproteobacteria	Burkholderiales	Alcaligenaceae	Achromobacter
OTU14	Bacteria	Firmicutes	Clostridia	Clostridiales	IncertaeSedis	Acidaminobacter
OTU15	Bacteria	Firmicutes	Negativicutes	Acidaminococcales	Acidaminococcaceae	Acidaminococcus
OTU18	Bacteria	Proteobacteria	Alphaproteobacteria	Rhodospirillales	Acetobacteraceae	Acidicaldus
OTU19	Bacteria	Proteobacteria	Alphaproteobacteria	Rhodospirillales	Acetobacteraceae	Acidiphilium
OTU22	Bacteria	Actinobacteria	Acidimicrobiia	Acidimicrobiales	Acidimicrobiaceae	Aciditerrimonas
OTU23	Bacteria	Proteobacteria	Acidithiobacillia	AcidithioBacillales	Acidithiobacillaceae	Acidithiobacillus
OTU53	Bacteria	Proteobacteria	Gammaproteobacteria	Pseudomonadales	Moraxellaceae	Acinetobacter
OTU67	Bacteria	Actinobacteria	Actinobacteria	NA	NA	Actinobacterium
OTU69	Bacteria	Actinobacteria	Actinobacteria	Actinomycetales	Actinomycetaceae	Actinobaculum
OTU71	Bacteria	Actinobacteria	Actinobacteria	Micromonosporales	Micromonosporaceae	Actinocatenispora
OTU72	Bacteria	Actinobacteria	Actinobacteria	Streptosporangiales	Thermomonosporaceae	Actinocorallia
OTU75	Bacteria	Actinobacteria	Actinobacteria	Pseudonocardiales	Pseudonocardiaceae	Actinokineospora
OTU76	Bacteria	Actinobacteria	Actinobacteria	Streptosporangiales	Thermomonosporaceae	Actinomadura
OTU87	Bacteria	Actinobacteria	Actinobacteria	Actinomycetales	Actinomycetaceae	Actinomyces
OTU97	Bacteria	Actinobacteria	Actinobacteria	Pseudonocardiales	Pseudonocardiaceae	Actinophytocola
OTU99	Bacteria	Actinobacteria	Actinobacteria	Micromonosporales	Micromonosporaceae	Actinoplanes
OTU102	Bacteria	Actinobacteria	Actinobacteria	Actinopolysporales	Actinopolysporaceae	Actinopolyspora
OTU104	Bacteria	Actinobacteria	Actinobacteria	Micrococcales	Cellulomonadaceae	Actinotalea
OTU105	Bacteria	Firmicutes	Clostridia	Clostridiales	Ruminococcaceae	Acutalibacter
OTU111	Bacteria	Firmicutes	Bacilli	Lactobacillales	Aerococcaceae	Aerococcus
OTU114	Bacteria	Actinobacteria	Actinobacteria	Propionibacteriales	Nocardioidaceae	Aeromicrobium
OTU119	Bacteria	Proteobacteria	Gammaproteobacteria	Aeromonadales	Aeromonadaceae	Aeromonas
OTU121	Bacteria	Proteobacteria	Gammaproteobacteria	Alteromonadales	Alteromonadaceae	Agaribacter
OTU122	Bacteria	Proteobacteria	Gammaproteobacteria	Pasteurellales	Pasteurellaceae	Aggregatibacter
OTU123	Bacteria	Proteobacteria	Alphaproteobacteria	Rhizobiales	Rhizobiaceae	Agrobacterium
OTU127	Bacteria	Actinobacteria	Actinobacteria	Micrococcales	Microbacteriaceae	Agromyces
OTU130	Bacteria	Proteobacteria	Alphaproteobacteria	Rhodobacterales	Rhodobacteraceae	Ahrensia
OTU131	Bacteria	Proteobacteria	Gammaproteobacteria	Oceanospirillales	Halomonadaceae	Aidingimonas
OTU133	Bacteria	Proteobacteria	Gammaproteobacteria	Alteromonadales	Pseudoalteromonadaceae	Algicola
OTU134	Bacteria	Proteobacteria	Alphaproteobacteria	Rhodobacterales	Hyphomonadaceae	Algimonas
OTU141	Bacteria	Firmicutes	Bacilli	Bacillales	Alicyclobacillaceae	Alicyclobacillus
OTU144	Bacteria	Firmicutes	Bacilli	Bacillales	Staphylococcaceae	Aliicoccus
OTU146	Bacteria	Proteobacteria	Gammaproteobacteria	Oceanospirillales	Kangiellaceae	Aliikangiella
OTU147	Bacteria	Proteobacteria	Gammaproteobacteria	Alteromonadales	Alteromonadaceae	Alishewanella
OTU148	Bacteria	Firmicutes	Bacilli	Bacillales	Bacillaceae	Alkalibacillus
OTU149	Bacteria	Firmicutes	Clostridia	Clostridiales	Eubacteriaceae	Alkalibacter
OTU150	Bacteria	Firmicutes	Bacilli	Lactobacillales	Carnobacteriaceae	Alkalibacterium
OTU152	Bacteria	Firmicutes	Clostridia	Clostridiales	Eubacteriaceae	Alkalibaculum
OTU153	Bacteria	Firmicutes	Bacilli	Bacillales	NA	Alkalilactibacillus
OTU154	Bacteria	Proteobacteria	Gammaproteobacteria	Alteromonadales	Alteromonadaceae	Alkalimarinus
OTU157	Bacteria	Proteobacteria	Gammaproteobacteria	Pseudomonadales	Moraxellaceae	Alkanindiges
OTU158	Bacteria	Firmicutes	Bacilli	Bacillales	Bacillaceae	Allobacillus
OTU160	Bacteria	Actinobacteria	Actinobacteria	Micromonosporales	Micromonosporaceae	Allocatelliglobosispora
OTU161	Bacteria	Firmicutes	Bacilli	Lactobacillales	Carnobacteriaceae	Allofustis
OTU162	Bacteria	Actinobacteria	Actinobacteria	Bifidobacteriales	Bifidobacteriaceae	Alloscardovia
OTU163	Bacteria	Actinobacteria	Actinobacteria	Micrococcales	Microbacteriaceae	Alpinimonas
OTU164	Bacteria	Proteobacteria	Alphaproteobacteria	Sphingomonadales	Erythrobacteraceae	Altererythrobacter
OTU166	Bacteria	Firmicutes	Bacilli	Bacillales	Bacillaceae	Alteribacillus
OTU167	Bacteria	Proteobacteria	Alphaproteobacteria	Rhodobacterales	Rhodobacteraceae	Amaricoccus
OTU169	Bacteria	Firmicutes	Clostridia	Clostridiales	Eubacteriaceae	Aminicella
OTU170	Bacteria	Synergistetes	Synergistia	Synergistales	Synergistaceae	Aminivibrio
OTU171	Bacteria	Synergistetes	Synergistia	Synergistales	Synergistaceae	Aminobacterium
OTU174	Bacteria	Firmicutes	Bacilli	Bacillales	Paenibacillaceae	Ammoniibacillus
OTU175	Bacteria	Firmicutes	Bacilli	Bacillales	Bacillaceae	Amphibacillus
OTU179	Bacteria	Proteobacteria	Gammaproteobacteria	Oceanospirillales	Oceanospirillaceae	Amphritea
OTU184	Bacteria	Actinobacteria	Actinobacteria	Pseudonocardiales	Pseudonocardiaceae	Amycolatopsis
OTU185	Bacteria	Actinobacteria	Actinobacteria	Pseudonocardiales	Pseudonocardiaceae	Amycolatopsis
OTU187	Bacteria	Firmicutes	Bacilli	Bacillales	Bacillaceae	Anaerobacillus
OTU194	Bacteria	Firmicutes	Tissierellia	Tissierellales	Peptoniphilaceae	Anaerococcus
OTU197	Bacteria	Firmicutes	Clostridia	Clostridiales	Eubacteriaceae	Anaerofustis
OTU198	Bacteria	Chloroflexi	Anaerolineae	NA	NA	Anaerolineae
OTU199	Bacteria	Proteobacteria	Deltaproteobacteria	Myxococcales	Anaeromyxobacteraceae	Anaeromyxobacter
OTU202	Bacteria	Firmicutes	Tissierellia	Tissierellales	Peptoniphilaceae	Anaerosphaera
OTU204	Bacteria	Firmicutes	Clostridia	Clostridiales	Ruminococcaceae	Anaerotruncus
OTU206	Bacteria	Proteobacteria	Alphaproteobacteria	Rhizobiales	Rhodobiaceae	Anderseniella
OTU207	Bacteria	Firmicutes	Bacilli	Bacillales	Paenibacillaceae	Aneurinibacillus
OTU210	Bacteria	Actinobacteria	Actinobacteria	Kineosporiales	Kineosporiaceae	Angustibacter
OTU211	Bacteria	Firmicutes	Bacilli	Bacillales	Bacillaceae	Anoxybacillus
OTU220	Bacteria	Actinobacteria	Actinobacteria	Frankiales	NA	Antricoccus
OTU222	Bacteria	Proteobacteria	Betaproteobacteria	Neisseriales	Chromobacteriaceae	Aquaspirillum
OTU223	Bacteria	Firmicutes	Bacilli	Bacillales	Bacillaceae	Aquibacillus
OTU227	Bacteria	Actinobacteria	Actinobacteria	Actinomycetales	Actinomycetaceae	Arcanobacterium
OTU228	Bacteria	Proteobacteria	Gammaproteobacteria	Xanthomonadales	Xanthomonadaceae	Arenimonas
OTU231	Bacteria	Proteobacteria	Gammaproteobacteria	Chromatiales	Ectothiorhodospiraceae	Arhodomonas
OTU232	Bacteria	Actinobacteria	Actinobacteria	Micrococcales	Intrasporangiaceae	Arsenicicoccus
OTU233	Bacteria	Actinobacteria	Actinobacteria	Micrococcales	Intrasporangiaceae	Arsenophonus
OTU251	Bacteria	Actinobacteria	Actinobacteria	Micrococcales	Micrococcaceae	Arthrobacter
OTU266	Bacteria	Proteobacteria	Alphaproteobacteria	Rhodospirillales	Acetobacteraceae	Asaia
OTU267	Bacteria	Tenericutes	Mollicutes	Anaeroplasmatales	Anaeroplasmataceae	Asteroleplasma
OTU268	Bacteria	Proteobacteria	Alphaproteobacteria	Caulobacterales	Caulobacteraceae	Asticcacaulis
OTU270	Bacteria	Firmicutes	Bacilli	Lactobacillales	Carnobacteriaceae	Atopococcus
OTU272	Bacteria	Proteobacteria	Alphaproteobacteria	Rhizobiales	Aurantimonadaceae	Aurantimonas
OTU273	Bacteria	Firmicutes	Bacilli	Bacillales	Bacillaceae	Aureibacillus
OTU275	Bacteria	Actinobacteria	Actinobacteria	Micrococcales	Micrococcaceae	Auritidibacter
OTU276	Bacteria	Actinobacteria	Actinobacteria	Micrococcales	Dermatophilaceae	Austwickia
OTU278	Bacteria	Proteobacteria	Proteobacteria	Pseudomonadales	Pseudomonadaceae	Azomonas
OTU279	Bacteria	Proteobacteria	Alphaproteobacteria	Rhizobiales	Xanthobacteraceae	Azorhizobium
OTU283	Bacteria	Proteobacteria	Gammaproteobacteria	Pseudomonadales	Pseudomonadaceae	Azotobacter
OTU367	Bacteria	Firmicutes	Bacilli	Bacillales	Bacillaceae	Bacillus
OTU455	Bacteria	Proteobacteria	Oligoflexia	Bacteriovoracales	Halobacteriovoraceae	Bacteriovorax
OTU457	Bacteria	Verrucomicrobia	Verrucomicrobiae	Verrucomicrobiales	NA	bacterium
OTU463	Bacteria	Bacteroidetes	Bacteroidia	Bacteroidales	Bacteroidaceae	Bacteroides
OTU474	Bacteria	Proteobacteria	Gammaproteobacteria	Oceanospirillales	Balneatrichaceae	Balneatrix
OTU475	Bacteria	Firmicutes	Bacilli	Lactobacillales	Enterococcaceae	Bavariicoccus
OTU476	Bacteria	Proteobacteria	Oligoflexia	Bdellovibrionales	Bdellovibrionaceae	Bdellovibrio
OTU478	Bacteria	Proteobacteria	Oligoflexia	Bdellovibrionales	NA	Bdellovibrionales
OTU479	Bacteria	Actinobacteria	Actinobacteria	Micrococcales	Beutenbergiaceae	Beutenbergia
OTU480	Bacteria	Firmicutes	Bacilli	Bacillales	Planococcaceae	Bhargavaea
OTU491	Bacteria	Proteobacteria	Gammaproteobacteria	Enterobacterales	Enterobacteriaceae	Biostraticola
OTU492	Bacteria	Bacteroidetes	Flavobacteriia	Flavobacteriales	Flavobacteriaceae	Bizionia
OTU495	Bacteria	Actinobacteria	Actinobacteria	Micrococcales	Bogoriellaceae	Bogoriella
OTU497	Bacteria	Proteobacteria	Alphaproteobacteria	Rhizobiales	Bradyrhizobiaceae	Bosea
OTU506	Bacteria	Actinobacteria	Actinobacteria	Micrococcales	Dermabacteraceae	Brachybacterium
OTU512	Bacteria	Proteobacteria	Betaproteobacteria	Burkholderiales	Alcaligenaceae	Brackiella
OTU520	Bacteria	Firmicutes	Bacilli	Bacillales	Paenibacillaceae	Brevibacillus
OTU521	Bacteria	Actinobacteria	Actinobacteria	Micrococcales	Brevibacteriaceae	Brevibacteriaceae
OTU526	Bacteria	Actinobacteria	Actinobacteria	Micrococcales	Brevibacteriaceae	Brevibacterium
OTU536	Bacteria	Proteobacteria	Alphaproteobacteria	Caulobacterales	Caulobacteraceae	Brevundimonas
OTU537	Bacteria	Firmicutes	Erysipelotrichia	Erysipelotrichales	Erysipelotrichaceae	Breznakia
OTU540	Bacteria	Actinobacteria	Actinobacteria	Propionibacteriales	Propionibacteriaceae	Brooklawnia
OTU542	Bacteria	Proteobacteria	Gammaproteobacteria	Enterobacterales	Erwiniaceae	Buchnera
OTU543	Bacteria	Proteobacteria	Betaproteobacteria	Burkholderiales	Burkholderiaceae	Burkholderia
OTU546	Bacteria	Proteobacteria	Gammaproteobacteria	Enterobacterales	Enterobacteriaceae	Buttiauxella
OTU549	Bacteria	Firmicutes	Clostridia	Clostridiales	Clostridiaceae	Butyricicoccus
OTU551	Bacteria	Planctomycetes	Planctomycetia	Pirellulales	Lacipirellulaceae	Bythopirellula
OTU552	Bacteria	Proteobacteria	Alphaproteobacteria	Holosporales	Caedimonadaceae	Caedibacter
OTU557	Bacteria	Firmicutes	Clostridia	Thermoanaerobacterales	Thermoanaerobacteraceae	Caldanaerobacter
OTU559	Bacteria	Firmicutes	Clostridia	Thermoanaerobacterales	Thermoanaerobacteraceae	Calderihabitans
OTU560	Bacteria	Firmicutes	Clostridia	Clostridiales	Symbiobacteriaceae	Caldinitratiruptor
OTU561	Bacteria	Caldiserica	Caldisericia	Caldisericales	Caldisericaceae	Caldisericum
OTU562	Bacteria	Firmicutes	Bacilli	Bacillales	Bacillaceae	Calditerricola
OTU565	Bacteria	Firmicutes	Clostridia	Clostridiales	Clostridiaceae	Caloramator
OTU570	Bacteria	Proteobacteria	Epsilonproteobacteria	Campylobacterales	Campylobacteraceae	Campylobacter
OTU576	Bacteria	Proteobacteria	Gammaproteobacteria	Cardiobacteriales	Cardiobacteriaceae	Cardiobacterium
OTU578	Bacteria	Firmicutes	Clostridia	Clostridiales	Clostridiales Family XIII. Incertae Sedis	Casaltella
OTU579	Bacteria	Actinobacteria	Actinobacteria	Micromonosporales	Micromonosporaceae	Catellatospora
OTU580	Bacteria	Firmicutes	Bacilli	Lactobacillales	Enterococcaceae	Catellicoccus
OTU582	Bacteria	Proteobacteria	Gammaproteobacteria	Vibrionales	Vibrionaceae	Catenococcus
OTU583	Bacteria	Proteobacteria	Gammaproteobacteria	Alteromonadales	Alteromonadaceae	Catenovulum
OTU585	Bacteria	Actinobacteria	Actinobacteria	Catenulisporales	Catenulisporaceae	Catenulispora
OTU586	Bacteria	Proteobacteria	Gammaproteobacteria	Pseudomonadales	Moraxellaceae	Cavicella
OTU588	Bacteria	Proteobacteria	Gammaproteobacteria	Enterobacterales	Enterobacteriaceae	Cedecea
OTU590	Bacteria	Proteobacteria	Gammaproteobacteria	NA	Celerinatantimonadaceae	Celerinatantimonas
OTU593	Bacteria	Actinobacteria	Actinobacteria	Micrococcales	Cellulomonadaceae	Cellulomonas
OTU602	Bacteria	Actinobacteria	Actinobacteria	Micrococcales	Promicromonosporaceae	Cellulosimicrobium
OTU605	Bacteria	Proteobacteria	Gammaproteobacteria	CellVibrionales	Cellvibrionaceae	Cellvibrio
OTU608	Bacteria	Firmicutes	Bacilli	Bacillales	Bacillaceae	Cerasibacillus
OTU610	Bacteria	Fibrobacteres	Chitinispirillia	Chitinispirillales	Chitinispirillaceae	Chitinispirillum
OTU611	Bacteria	Fibrobacteres	Chitinispirillia	Chitinispirillales	Chitinispirillaceae	Chitinivibrio
OTU615	Bacteria	Bacteroidetes	Chlorobia	Chlorobiales	Chlorobiaceae	Chloroherpeton
OTU616	Bacteria	Proteobacteria	Gammaproteobacteria	Chromatiales	Chromatiaceae	Chromatium
OTU617	Bacteria	Proteobacteria	Betaproteobacteria	Neisseriales	Chromobacteriaceae	Chromobacterium
OTU618	Bacteria	Cyanobacteria	NA	Chroococcidiopsidales	Chroococcidiopsidaceae	Chroococcidiopsis
OTU619	Bacteria	Bacteroidetes	Flavobacteriia	Flavobacteriales	Flavobacteriaceae	Chryseobacterium
OTU623	Bacteria	Firmicutes	Bacilli	Lactobacillales	NA	Chungangia
OTU625	Bacteria	Actinobacteria	Actinobacteria	Micrococcales	Micrococcaceae	Citricoccus
OTU629	Bacteria	Proteobacteria	Gammaproteobacteria	Enterobacterales	Enterobacteriaceae	Citrobacter
OTU636	Bacteria	Proteobacteria	Gammaproteobacteria	Enterobacterales	Enterobacteriaceae	Clavibacter
OTU638	Bacteria	Bacteroidetes	Cytophagia	Cytophagales	Amoebophilaceae	Cloacimonas
OTU640	Bacteria	Firmicutes	Clostridia	Clostridiales	Clostridiaceae	Clostridiisalibacter
OTU661	Bacteria	Firmicutes	Clostridia	Clostridiales	Clostridiaceae	Clostridium
OTU707	Bacteria	Firmicutes	Bacilli	Bacillales	Paenibacillaceae	Cohnella
OTU722	Bacteria	Coprothermobacterota	Coprothermobacteria	Coprothermobacterales	Coprothermobacteraceae	Coprothermobacter
OTU723	Bacteria	Proteobacteria	Gammaproteobacteria	Alteromonadales	Alteromonadaceae	Corallomonas
OTU773	Bacteria	Actinobacteria	Actinobacteria	Corynebacteriales	Corynebacteriaceae	Corynebacterium
OTU795	Bacteria	Proteobacteria	Gammaproteobacteria	Legionellales	Coxiellaceae	Coxiella
OTU798	Bacteria	Chlamydiae	Chlamydiia	Parachlamydiales	Criblamydiaceae	Criblamydia
OTU804	Bacteria	Proteobacteria	Gammaproteobacteria	Enterobacterales	Enterobacteriaceae	Cronobacter
OTU806	Bacteria	Bacteroidetes	Flavobacteriia	Flavobacteriales	Flavobacteriaceae	Cruoricaptor
OTU807	Bacteria	Actinobacteria	Actinobacteria	Micrococcales	Microbacteriaceae	Cryobacterium
OTU808	Bacteria	Bacteroidetes	Flavobacteriia	Flavobacteriales	Cryomorphaceae	Cryomorpha
OTU809	Bacteria	Firmicutes	Clostridia	Clostridiales	Peptococcaceae	Cryptanaerobacter
OTU810	Bacteria	Viridiplantae	Magnoliopsida	Cucurbitales	Cucurbitaceae	Cucumis
OTU811	Bacteria	Firmicutes	Clostridia	Clostridiales	Lachnospiraceae	Cuneatibacter
OTU812	Bacteria	Actinobacteria	Actinobacteria	Micrococcales	Microbacteriaceae	Curtobacterium
OTU814	Bacteria	Proteobacteria	Gammaproteobacteria	Thiotrichales	Piscirickettsiaceae	Cycloclasticus
OTU817	Bacteria	Proteobacteria	Deltaproteobacteria	NA	NA	Deferrisoma
OTU818	Bacteria	Proteobacteria	Alphaproteobacteria	Rhodospirillales	Rhodospirillaceae	Defluviicoccus
OTU820	Bacteria	Firmicutes	Clostridia	Clostridiales	Peptococcaceae	Dehalobacter
OTU821	Bacteria	Chloroflexi	Dehalococcoidia	Dehalococcoidales	Dehalococcoidaceae	Dehalococcoides
OTU822	Bacteria	Deinococcus-Thermus	Deinococci	Deinococcales	Deinococcaceae	Deinobacterium
OTU823	Bacteria	Actinobacteria	Actinobacteria	Micrococcales	Demequinaceae	Demequina
OTU825	Bacteria	Actinobacteria	Actinobacteria	Micrococcales	Dermacoccaceae	Demetria
OTU826	Bacteria	Firmicutes	Negativicutes	Selenomonadales	Sporomusaceae	Dendrosporobacter
OTU830	Bacteria	Actinobacteria	Actinobacteria	Micrococcales	Dermacoccaceae	Dermacoccus
OTU832	Bacteria	Actinobacteria	Actinobacteria	Micrococcales	Dermatophilaceae	Dermatophilus
OTU833	Bacteria	Proteobacteria	Betaproteobacteria	Burkholderiales	Alcaligenaceae	Derxia
OTU835	Bacteria	Firmicutes	Bacilli	Lactobacillales	Carnobacteriaceae	Desemzia
OTU839	Bacteria	Firmicutes	Clostridia	Clostridiales	Peptococcaceae	Desulfitibacter
OTU841	Bacteria	Firmicutes	Clostridia	Clostridiales	Peptococcaceae	Desulfitobacterium
OTU844	Bacteria	Proteobacteria	Deltaproteobacteria	Syntrophobacterales	Syntrophobacteraceae	Desulfoglaeba
OTU846	Bacteria	Proteobacteria	Deltaproteobacteria	DesulfoVibrionales	Desulfohalobiaceae	Desulfohalobium
OTU848	Bacteria	Proteobacteria	Deltaproteobacteria	Syntrophobacterales	Syntrophaceae	Desulfomonile
OTU851	Bacteria	Proteobacteria	Deltaproteobacteria	DesulfoVibrionales	Desulfonatronaceae	Desulfonauticus
OTU853	Bacteria	Proteobacteria	Deltaproteobacteria	Desulfobacterales	Desulfobacteraceae	Desulfonema
OTU854	Bacteria	Firmicutes	Clostridia	Clostridiales	Peptococcaceae	Desulfonispora
OTU855	Bacteria	Proteobacteria	Deltaproteobacteria	Desulfobacterales	Desulfobulbaceae	Desulfopila
OTU858	Bacteria	Proteobacteria	Deltaproteobacteria	Desulfobacterales	Desulfobulbaceae	Desulforegula
OTU859	Bacteria	Proteobacteria	Deltaproteobacteria	Syntrophobacterales	Syntrophobacteraceae	Desulfosoma
OTU860	Bacteria	Firmicutes	Negativicutes	Selenomonadales	Sporomusaceae	Desulfosporomusa
OTU861	Bacteria	Firmicutes	Negativicutes	Selenomonadales	Sporomusaceae	Desulfosporosinus
OTU862	Bacteria	Proteobacteria	Deltaproteobacteria	DesulfoVibrionales	Desulfohalobiaceae	Desulfothermus
OTU870	Bacteria	Firmicutes	Clostridia	Clostridiales	Peptococcaceae	Desulfotomaculum
OTU876	Bacteria	Proteobacteria	Deltaproteobacteria	DesulfoVibrionales	Desulfovibrionaceae	Desulfovibrio
OTU886	Bacteria	Proteobacteria	Deltaproteobacteria	Desulfuromonadales	Desulfuromonadaceae	Desulfuromonas
OTU891	Bacteria	Actinobacteria	Actinobacteria	Micrococcales	Dermabacteraceae	Devriesea
OTU892	Bacteria	Firmicutes	Negativicutes	Veillonellales	Veillonellaceae	Dialister
OTU896	Bacteria	Actinobacteria	Actinobacteria	Corynebacteriales	Dietziaceae	Dietzia
OTU909	Bacteria	Firmicutes	Bacilli	Bacillales	Bacillaceae	Domibacillus
OTU913	Bacteria	Bacteroidetes	Bacteroidia	Bacteroidales	Dysgonamonadaceae	Dysgonomonas
OTU915	Bacteria	Proteobacteria	Gammaproteobacteria	Chromatiales	Ectothiorhodospiraceae	Ectothiorhodospira
OTU919	Bacteria	Actinobacteria	Nitriliruptoria	Egibacterales	Egibacteraceae	Egibacter
OTU921	Bacteria	Proteobacteria	Alphaproteobacteria	Rhodospirillales	Elioraeaceae	Elioraea
OTU922	Bacteria	Firmicutes	Clostridia	Clostridiales	Clostridiales Family XIII. Incertae Sedis	Emergencia
OTU923	Bacteria	Bacteroidetes	Cytophagia	Cytophagales	Cytophagaceae	Emticicia
OTU924	Bacteria	Proteobacteria	Gammaproteobacteria	Enterobacterales	Enterobacteriaceae	Endobacter
OTU925	Bacteria	Proteobacteria	Alphaproteobacteria	Rhizobiales	Rhizobiaceae	Ensifer
OTU926	Bacteria	Actinobacteria	Actinobacteria	Micrococcales	Micrococcaceae	Enteractinococcus
OTU929	Bacteria	Proteobacteria	Gammaproteobacteria	Enterobacterales	Enterobacteriaceae	Enterobacter
OTU944	Bacteria	Firmicutes	Bacilli	Lactobacillales	Enterococcaceae	Enterococcus
OTU963	Bacteria	Tenericutes	Mollicutes	Entomoplasmatales	Entomoplasmataceae	Entomoplasma
OTU964	Bacteria	Bacteroidetes	Flavobacteriia	Flavobacteriales	Flavobacteriaceae	Epilithonimonas
OTU965	Bacteria	Firmicutes	Bacilli	Lactobacillales	Aerococcaceae	Eremococcus
OTU978	Bacteria	Proteobacteria	Gammaproteobacteria	Enterobacterales	Erwiniaceae	Erwinia
OTU987	Bacteria	Proteobacteria	Gammaproteobacteria	Enterobacterales	Enterobacteriaceae	Escherichia/Shigella
OTU985	Bacteria	Proteobacteria	Gammaproteobacteria	Enterobacterales	Enterobacteriaceae	Escherichia
OTU988	Bacteria	Firmicutes	Clostridia	Clostridiales	Eubacteriaceae	Eubacterium
OTU999	Bacteria	Bacteroidetes	Flavobacteriia	Flavobacteriales	Flavobacteriaceae	Eudoraea
OTU1002	Bacteria	Proteobacteria	Gammaproteobacteria	Enterobacterales	Yersiniaceae	Ewingella
OTU1005	Bacteria	Firmicutes	Bacilli	Bacillales	Exiguobacterium	Exiguobacterium
OTU1013	Bacteria	Firmicutes	Tissierellia	NA	NA	Ezakiella
OTU1019	Bacteria	Firmicutes	Bacilli	Lactobacillales	Aerococcaceae	Facklamia
OTU1021	Bacteria	Firmicutes	Bacilli	Bacillales	Bacillaceae	Falsibacillus
OTU1023	Bacteria	Firmicutes	Clostridia	Clostridiales	NA	Fenollaria
OTU1025	Bacteria	Proteobacteria	Gammaproteobacteria	Alteromonadales	Ferrimonadaceae	Ferrimonas
OTU1031	Bacteria	Firmicutes	Bacilli	Bacillales	Bacillaceae	Filobacillus
OTU1034	Bacteria	Firmicutes	Tissierellia	Tissierellales	Peptoniphilaceae	Finegoldia
OTU1037	Bacteria	Bacteroidetes	Chitinophagia	Chitinophagales	Chitinophagaceae	Flavisolibacter
OTU1038	Bacteria	Bacteroidetes	Flavobacteriia	Flavobacteriales	Flavobacteriaceae	Flavobacterium
OTU1043	Bacteria	Bacteroidetes	Cytophagia	Cytophagales	Flammeovirgaceae	Flexithrix
OTU1044	Bacteria	Actinobacteria	Actinobacteria	Micrococcales	Dermacoccaceae	Flexivirga
OTU1045	Bacteria	Firmicutes	Clostridia	Clostridiales	NA	Flintibacter
OTU1046	Bacteria	Proteobacteria	Gammaproteobacteria	Pseudomonadales	Moraxellaceae	Fluviicoccus
OTU1047	Bacteria	Actinobacteria	Actinobacteria	Cryptosporangiales	Cryptosporangiaceae	Fodinicola
OTU1048	Bacteria	Firmicutes	Bacilli	Bacillales	Paenibacillaceae	Fontibacillus
OTU1052	Bacteria	Actinobacteria	Actinobacteria	Micrococcales	Microbacteriaceae	Frondihabitans
OTU1053	Bacteria	Firmicutes	Bacilli	Lactobacillales	Leuconostocaceae	Fructobacillus
OTU1054	Bacteria	Firmicutes	Clostridia	Clostridiales	ClostridialesFamilyXII	Fusibacter
OTU1056	Bacteria	Firmicutes	Clostridia	Clostridiales	Lachnospiraceae	Fusicatenibacter
OTU1057	Bacteria	Actinobacteria	Rubrobacteria	Gaiellales	Gaiellaceae	Gaiella
OTU1058	Bacteria	Proteobacteria	Gammaproteobacteria	Thiotrichales	Piscirickettsiaceae	Galenea
OTU1059	Bacteria	Firmicutes	Tissierellia	Tissierellales	Peptoniphilaceae	Gallicola
OTU1062	Bacteria	Firmicutes	Clostridia	Thermoanaerobacterales	Thermoanaerobacteraceae	Gelria
OTU1065	Bacteria	Firmicutes	Clostridia	Clostridiales	IncertaeSedis	Gemella
OTU1070	Bacteria	Gemmatimonadetes	Gemmatimonadetes	Gemmatimonadales	Gemmatimonadaceae	Gemmatirosa
OTU1072	Bacteria	Proteobacteria	Alphaproteobacteria	Rhodobacterales	Rhodobacteraceae	Gemmobacter
OTU1073	Bacteria	Proteobacteria	Alphaproteobacteria	Rhodobacterales	Rhodobacteraceae	Geoalkalibacter
OTU1075	Bacteria	Firmicutes	Bacilli	Bacillales	Bacillaceae	Geobacillus
OTU1077	Bacteria	Proteobacteria	Deltaproteobacteria	Desulfuromonadales	Geobacteraceae	Geobacter
OTU1078	Bacteria	Actinobacteria	Actinobacteria	Geodermatophilales	Geodermatophilaceae	Geodermatophilus
OTU1080	Bacteria	Firmicutes	Bacilli	Bacillales	NA	Geomicrobium
OTU1081	Bacteria	Proteobacteria	Deltaproteobacteria	Desulfuromonadales	Geobacteraceae	Geopsychrobacter
OTU1082	Bacteria	Pctinobacteria	Actinobacteria	Micrococcales	Bogoriellaceae	Georgenia
OTU1085	Bacteria	Firmicutes	Clostridia	Clostridiales	Clostridiaceae	Geosporobacter
OTU1086	Bacteria	Proteobacteria	Alphaproteobacteria	Rickettsiales	Anaplasmataceae	Geothermobacter
OTU1088	Bacteria	Bacteroidetes	Flavobacteriia	Flavobacteriales	Flavobacteriaceae	Gillisia
OTU1090	Bacteria	Proteobacteria	Gammaproteobacteria	CellVibrionales	Cellvibrionaceae	Gilvimarinus
OTU1094	Bacteria	Firmicutes	Bacilli	Lactobacillales	Aerococcaceae	Globicatella
OTU1095	Bacteria	Proteobacteria	Alphaproteobacteria	Rhodospirillales	Acetobacteraceae	Gluconacetobacter
OTU1096	Bacteria	Proteobacteria	Alphaproteobacteria	Rhodospirillales	Acetobacteraceae	Gluconobacter
OTU1098	Bacteria	Actinobacteria	Actinobacteria	Glycomycetales	Glycomycetaceae	Glycomyces
OTU1102	Bacteria	Actinobacteria	Actinobacteria	Corynebacteriales	Gordoniaceae	Gordonia
OTU1106	Bacteria	Firmicutes	Bacilli	Bacillales	Paenibacillaceae	Gorillibacterium
OTU1108	Bacteria	Firmicutes	Bacilli	Bacillales	Bacillaceae	Gracilibacillus
OTU1110	Bacteria	Firmicutes	Clostridia	Clostridiales	Gracilibacteraceae	Gracilibacter
OTU1112	Bacteria	Firmicutes	Bacilli	Lactobacillales	Carnobacteriaceae	Granulicatella
OTU1117	Bacteria	Actinobacteria	Actinobacteria	Micrococcales	Microbacteriaceae	Gulosibacter
OTU1118	Bacteria	Proteobacteria	Gammaproteobacteria	Oceanospirillales	Saccharospirillaceae	Gynuella
OTU1119	Bacteria	Proteobacteria	Alphaproteobacteria	Rhodobacterales	Rhodobacteraceae	Haematobacter
OTU1120	Bacteria	Proteobacteria	Gammaproteobacteria	Pasteurellales	Pasteurellaceae	Haemophilus
OTU1124	Bacteria	Proteobacteria	Gammaproteobacteria	Oceanospirillales	Hahellaceae	Hahella
OTU1125	Bacteria	Firmicutes	Bacilli	Bacillales	Bacillaceae	Halalkalibacillus
OTU1128	Bacteria	Firmicutes	Clostridia	Halanaerobiales	Halanaerobiaceae	Halanaerobium
OTU1130	Bacteria	Proteobacteria	Deltaproteobacteria	Myxococcales	Kofleriaceae	Haliangium
OTU1131	Bacteria	Proteobacteria	Gammaproteobacteria	CellVibrionales	Halieaceae	Haliea
OTU1132	Bacteria	Proteobacteria	Gammaproteobacteria	CellVibrionales	Halieaceae	Halioglobus
OTU1133	Bacteria	Actinobacteria	Actinobacteria	Micrococcales	Ruaniaceae	Haloactinobacterium
OTU1134	Bacteria	Actinobacteria	Actinobacteria	Jiangellales	Jiangellaceae	Haloactinopolyspora
OTU1137	Bacteria	Firmicutes	Bacilli	Bacillales	Bacillaceae	Halobacillus
OTU1144	Bacteria	Firmicutes	Bacilli	Bacillales	Bacillaceae	Halolactibacillus
OTU1145	Bacteria	Cyanobacteria	NA	Synechococcales	Prochlorotrichaceae	Halomicronema
OTU1165	Bacteria	Proteobacteria	Gammaproteobacteria	Oceanospirillales	Halomonadaceae	Halomonas
OTU1182	Bacteria	Firmicutes	Clostridia	Halanaerobiales	Halobacteroidaceae	Halonatronum
OTU1183	Bacteria	NA	NA	Haloplasmatales	Haloplasmataceae	Haloplasma
OTU1184	Bacteria	Proteobacteria	Gammaproteobacteria	Chromatiales	Ectothiorhodospiraceae	Halorhodospira
OTU1187	Bacteria	Proteobacteria	Alphaproteobacteria	Rhodobacterales	Rhodobacteraceae	Halovulum
OTU1188	Bacteria	Proteobacteria	Alphaproteobacteria	Rhizobiales	Methylocystaceae	Hansschlegelia
OTU1190	Bacteria	Proteobacteria	Alphaproteobacteria	Rhodobacterales	Rhodobacteraceae	Hasllibacter
OTU1191	Bacteria	Firmicutes	Bacilli	Bacillales	Thermoactinomycetaceae	Hazenella
OTU1192	Bacteria	Actinobacteria	Actinobacteria	Micrococcales	Dermabacteraceae	Helcobacillus
OTU1194	Bacteria	Firmicutes	Tissierellia	Tissierellales	Peptoniphilaceae	Helcococcus
OTU1196	Bacteria	Firmicutes	Clostridia	Clostridiales	Heliobacteriaceae	Heliobacterium
OTU1197	Bacteria	Actinobacteria	Actinobacteria	Micrococcales	Microbacteriaceae	Herbiconiux
OTU1198	Bacteria	Proteobacteria	Alphaproteobacteria	Rhizobiales	Phyllobacteriaceae	Hoeflea
OTU1200	Bacteria	Actinobacteria	Holophagae	Holophagales	Holophagaceae	Holophaga
OTU1201	Bacteria	Actinobacteria	Actinobacteria	Micrococcales	Microbacteriaceae	Homoserinimonas
OTU1203	Bacteria	Firmicutes	NA	NA	NA	Hydrogenispora
OTU1207	Bacteria	Proteobacteria	Gammaproteobacteria	Alteromonadales	Idiomarinaceae	Idiomarina
OTU1209	Bacteria	Ignavibacteriae	Ignavibacteria	Ignavibacteriales	Ignavibacteriaceae	Ignavibacterium
OTU1210	Bacteria	Firmicutes	Bacilli	Lactobacillales	Aerococcaceae	Ignavigranum
OTU1211	Bacteria	Firmicutes	Clostridia	Clostridiales	Clostridiales Family XIII. Incertae Sedis	Ihubacter
OTU1212	Bacteria	Actinobacteria	Acidimicrobiia	Acidimicrobiales	Ilumatobacteraceae	Ilumatobacter
OTU1215	Bacteria	Firmicutes	Clostridia	Clostridiales	Eubacteriaceae	Intestinibacillus
OTU1216	Bacteria	Firmicutes	Clostridia	Clostridiales	NA	Intestinimonas
OTU1218	Bacteria	Actinobacteria	Actinobacteria	Micrococcales	Intrasporangiaceae	Intrasporangium
OTU1219	Bacteria	Firmicutes	Clostridia	Clostridiales	Eubacteriaceae	Irregularibacter
OTU1220	Bacteria	Firmicutes	Bacilli	Lactobacillales	Carnobacteriaceae	Isobaculum
OTU1221	Bacteria	Proteobacteria	Gammaproteobacteria	Chromatiales	Chromatiaceae	Isochromatium
OTU1223	Bacteria	Actinobacteria	Actinobacteria	Micrococcales	Intrasporangiaceae	Janibacter
OTU1229	Bacteria	Proteobacteria	Alphaproteobacteria	Rhodobacterales	Rhodobacteraceae	Jannaschia
OTU1231	Bacteria	Actinobacteria	Actinobacteria	Frankiales	Frankiaceae	Jatrophihabitans
OTU1235	Bacteria	Firmicutes	Bacilli	Bacillales	Staphylococcaceae	Jeotgalicoccus
OTU1242	Bacteria	Firmicutes	Erysipelotrichia	Erysipelotrichales	Erysipelotrichaceae	Kandleria
OTU1243	Bacteria	Proteobacteria	Gammaproteobacteria	Oceanospirillales	Kangiellaceae	Kangiella
OTU1246	Bacteria	Proteobacteria	Alphaproteobacteria	Kiloniellales	Kiloniellaceae	Kiloniella
OTU1247	Bacteria	Actinobacteria	Actinobacteria	Kineosporiales	Kineosporiaceae	Kineococcus
OTU1248	Bacteria	Actinobacteria	Actinobacteria	Micrococcales	Dermatophilaceae	Kineosphaera
OTU1251	Bacteria	Proteobacteria	Gammaproteobacteria	Oceanospirillales	Endozoicomonadaceae	Kistimonas
OTU1252	Bacteria	Actinobacteria	Actinobacteria	Streptomycetales	Streptomycetaceae	Kitasatospora
OTU1260	Bacteria	Proteobacteria	Gammaproteobacteria	Enterobacterales	Enterobacteriaceae	Klebsiella
OTU1261	Bacteria	Actinobacteria	Actinobacteria	Micrococcales	Microbacteriaceae	Klugiella
OTU1262	Bacteria	Proteobacteria	Gammaproteobacteria	Enterobacterales	Enterobacteriaceae	Kluyvera
OTU1265	Bacteria	Proteobacteria	Gammaproteobacteria	Enterobacterales	Enterobacteriaceae	Knoellia
OTU1275	Bacteria	Actinobacteria	Actinobacteria	Micrococcales	Micrococcaceae	Kocuria
OTU1277	Bacteria	Proteobacteria	Deltaproteobacteria	Myxococcales	Nannocystineae	Kofleria
OTU1278	Bacteria	Proteobacteria	Gammaproteobacteria	Enterobacterales	Enterobacteriaceae	Kosakonia
OTU1282	Bacteria	Actinobacteria	Actinobacteria	Propionibacteriales	Nocardioidaceae	Kribbella
OTU1283	Bacteria	Firmicutes	Bacilli	Bacillales	Thermoactinomycetaceae	Kroppenstedtia
OTU1285	Bacteria	Proteobacteria	Gammaproteobacteria	Oceanospirillales	Halomonadaceae	Kushneria
OTU1287	Bacteria	Actinobacteria	Actinobacteria	Micrococcales	Dermacoccaceae	Kytococcus
OTU1292	Bacteria	Actinobacteria	Actinobacteria	Micrococcales	Microbacteriaceae	Laceyella
OTU1300	Bacteria	Firmicutes	Bacilli	Lactobacillales	Lactobacillaceae	Lactobacillus
OTU1320	Bacteria	Firmicutes	Bacilli	Lactobacillales	Streptococcaceae	Lactococcus
OTU1322	Bacteria	Firmicutes	Bacilli	Lactobacillales	Streptococcaceae	Lapillicoccus
OTU1323	Bacteria	Bacteroidetes	Cytophagia	Cytophagales	Cytophagaceae	Larkinella
OTU1324	Bacteria	Bacteroidetes	Bacteroidia	Bacteroidales	Porphyromonadaceae	Lascolabacillus
OTU1326	Bacteria	Proteobacteria	Deltaproteobacteria	DesulfoVibrionales	Desulfovibrionaceae	Lawsonia
OTU1327	Bacteria	Proteobacteria	Epsilonproteobacteria	Nautiliales	Nautiliaceae	Lebetimonas
OTU1328	Bacteria	Proteobacteria	Gammaproteobacteria	Legionellales	Legionellaceae	Legionella
OTU1332	Bacteria	Proteobacteria	Gammaproteobacteria	Enterobacterales	Budviciaceae	Leminorella
OTU1336	Bacteria	Firmicutes	Bacilli	Bacillales	Bacillaceae	Lentibacillus
OTU1341	Bacteria	Actinobacteria	Actinobacteria	Pseudonocardiales	Pseudonocardiaceae	Lentzea
OTU1344	Bacteria	Proteobacteria	Betaproteobacteria	Burkholderiales	NA	Leptothrix
OTU1347	Bacteria	Actinobacteria	Actinobacteria	Micrococcales	Microbacteriaceae	Leucobacter
OTU1354	Bacteria	Bacteroidetes	Cytophagia	Cytophagales	Flammeovirgaceae	Limibacter
OTU1355	Bacteria	Proteobacteria	Alphaproteobacteria	Rhodospirillales	Rhodospirillaceae	Limimonas
OTU1357	Bacteria	Firmicutes	Limnochordia	Limnochordales	Limnochordaceae	Limnochorda
OTU1358	Bacteria	Firmicutes	Bacilli	Bacillales	Listeriaceae	Listeria
OTU1359	Bacteria	Proteobacteria	Gammaproteobacteria	Oceanospirillales	Oceanospirillaceae	Litoribacillus
OTU1361	Bacteria	Firmicutes	Erysipelotrichia	Erysipelotrichales	Erysipelotrichaceae	Longibaculum
OTU1363	Bacteria	Proteobacteria	Gammaproteobacteria	Enterobacterales	Pectobacteriaceae	Lonsdalea
OTU1364	Bacteria	Actinobacteria	Actinobacteria	Micromonosporales	Micromonosporaceae	Luedemannella
OTU1366	Bacteria	Proteobacteria	Gammaproteobacteria	CellVibrionales	Halieaceae	Luminiphilus
OTU1367	Bacteria	Proteobacteria	Gammaproteobacteria	Xanthomonadales	Rhodanobacteraceae	Luteibacter
OTU1368	Bacteria	Actinobacteria	Actinobacteria	Micrococcales	NA	Luteimicrobium
OTU1370	Bacteria	Proteobacteria	Gammaproteobacteria	Xanthomonadales	Xanthomonadaceae	Luteimonas
OTU1378	Bacteria	Firmicutes	Bacilli	Bacillales	Bacillaceae	Lysinibacillus
OTU1385	Bacteria	Proteobacteria	Gammaproteobacteria	Xanthomonadales	Xanthomonadaceae	Lysobacter
OTU1393	Bacteria	Proteobacteria	Alphaproteobacteria	Rhodospirillales	Rhodospirillaceae	Magnetovibrio
OTU1396	Bacteria	Firmicutes	Bacilli	Lactobacillales	Carnobacteriaceae	Marinilactibacillus
OTU1397	Bacteria	Actinobacteria	Actinobacteria	Propionibacteriales	Propionibacteriaceae	Marinilutecoccus
OTU1398	Bacteria	Proteobacteria	Gammaproteobacteria	CellVibrionales	Cellvibrionaceae	Marinimicrobium
OTU1399	Bacteria	Firmicutes	Bacilli	Bacillales	Thermoactinomycetaceae	Marininema
OTU1400	Bacteria	Proteobacteria	Gammaproteobacteria	Alteromonadales	Alteromonadaceae	Marinobacter
OTU1404	Bacteria	Proteobacteria	Gammaproteobacteria	Oceanospirillales	Oceanospirillaceae	Marinobacterium
OTU1409	Bacteria	Proteobacteria	Gammaproteobacteria	Oceanospirillales	Oceanospirillaceae	Marinomonas
OTU1414	Bacteria	Proteobacteria	Gammaproteobacteria	Oceanospirillales	Oceanospirillaceae	Marinospirillum
OTU1415	Bacteria	Proteobacteria	Zetaproteobacteria	Mariprofundales	Mariprofundaceae	Mariprofundus
OTU1416	Bacteria	Firmicutes	Clostridia	Clostridiales	Lachnospiraceae	Marvinbryantia
OTU1418	Bacteria	Proteobacteria	Betaproteobacteria	Burkholderiales	Oxalobacteraceae	Massilia
OTU1420	Bacteria	Firmicutes	Bacilli	Bacillales	Bacillaceae	Massilibacterium
OTU1425	Bacteria	Proteobacteria	Alphaproteobacteria	Rhizobiales	Methylobacteriaceae	Meganema
OTU1426	Bacteria	Firmicutes	Negativicutes	Veillonellales	Veillonellaceae	Megasphaera
OTU1429	Bacteria	Firmicutes	Bacilli	Bacillales	Thermoactinomycetaceae	Melghirimyces
OTU1431	Bacteria	Firmicutes	Bacilli	Lactobacillales	Enterococcaceae	Melissococcus
OTU1432	Bacteria	Proteobacteria	Alphaproteobacteria	Rhizobiales	Phyllobacteriaceae	Mesorhizobium
OTU1435	Bacteria	Proteobacteria	Alphaproteobacteria	Rhodobacterales	Rhodobacteraceae	Methylarcula
OTU1436	Bacteria	Proteobacteria	Betaproteobacteria	Nitrosomonadales	Methylophilaceae	Methylobacillus
OTU1438	Bacteria	Proteobacteria	Gammaproteobacteria	Methylococcales	Methylococcaceae	Methylogaea
OTU1443	Bacteria	Proteobacteria	Gammaproteobacteria	Methylococcales	Methylothermaceae	Methylomarinovum
OTU1444	Bacteria	Proteobacteria	Gammaproteobacteria	Methylococcales	Methylococcaceae	Methylomicrobium
OTU1445	Bacteria	Proteobacteria	Gammaproteobacteria	Thiotrichales	Piscirickettsiaceae	Methylophaga
OTU1449	Bacteria	Firmicutes	Bacilli	Bacillales	Bacillaceae	Microaerobacter
OTU1450	Bacteria	Actinobacteria	Actinobacteria	Micrococcales	Microbacteriaceae	Microbacterium
OTU1464	Bacteria	Proteobacteria	Gammaproteobacteria	CellVibrionales	Microbulbiferaceae	Microbulbifer
OTU1467	Bacteria	Actinobacteria	Actinobacteria	Micrococcales	Microbacteriaceae	Microcella
OTU1472	Bacteria	Actinobacteria	Actinobacteria	Micrococcales	Microbacteriaceae	Micrococcus
OTU1479	Bacteria	Actinobacteria	Actinobacteria	Micromonosporales	Micromonosporaceae	Micromonospora
OTU1491	Bacteria	Actinobacteria	Actinobacteria	Geodermatophilales	Geodermatophilaceae	Modestobacter
OTU1492	Bacteria	Actinobacteria	Actinobacteria	Geodermatophilales	Geodermatophilaceae	Modicisalibacter
OTU1493	Bacteria	Proteobacteria	Gammaproteobacteria	Enterobacterales	Morganellaceae	Moellerella
OTU1497	Bacteria	Proteobacteria	Gammaproteobacteria	Pseudomonadales	Moraxellaceae	Moraxella
OTU1507	Bacteria	Actinobacteria	Actinobacteria	Corynebacteriales	Mycobacteriaceae	Mycobacterium
OTU1516	Bacteria	Tenericutes	Mollicutes	Mycoplasmatales	Mycoplasmataceae	Mycoplasma
OTU1522	Bacteria	Firmicutes	Bacilli	Bacillales	Bacillaceae	Natribacillus
OTU1524	Bacteria	Firmicutes	Clostridia	Halanaerobiales	Halobacteroidaceae	Natroniella
OTU1526	Bacteria	Firmicutes	Bacilli	Bacillales	Bacillaceae	Natronobacillus
OTU1527	Bacteria	Firmicutes	Bacilli	Bacillales	Bacillaceae	Negativibacillus
OTU1530	Bacteria	Proteobacteria	Betaproteobacteria	Neisseriales	Neisseriaceae	Neisseria
OTU1533	Bacteria	Proteobacteria	Gammaproteobacteria	Oceanospirillales	Oceanospirillaceae	Neptuniibacter
OTU1535	Bacteria	Proteobacteria	Gammaproteobacteria	Oceanospirillales	Oceanospirillaceae	Neptunomonas
OTU1536	Bacteria	Actinobacteria	Actinobacteria	Micrococcales	Micrococcaceae	Nesterenkonia
OTU1543	Bacteria	Proteobacteria	Epsilonproteobacteria	Campylobacterales	NA	Nitratifractor
OTU1544	Bacteria	Proteobacteria	Alphaproteobacteria	Rhizobiales	Phyllobacteriaceae	Nitratireductor
OTU1545	Bacteria	Proteobacteria	Gammaproteobacteria	Oceanospirillales	Oceanospirillaceae	Nitrincola
OTU1546	Bacteria	Proteobacteria	Alphaproteobacteria	Rhizobiales	Bradyrhizobiaceae	Nitrobacter
OTU1547	Bacteria	Proteobacteria	Gammaproteobacteria	Chromatiales	Chromatiaceae	Nitrococcus
OTU1549	Bacteria	Proteobacteria	Gammaproteobacteria	Chromatiales	Chromatiaceae	Nitrosococcus
OTU1551	Bacteria	Proteobacteria	Betaproteobacteria	Nitrosomonadales	Nitrosomonadaceae	Nitrosomonas
OTU1555	Bacteria	Actinobacteria	Actinobacteria	Corynebacteriales	Nocardiaceae	Nocardia
OTU1558	Bacteria	Actinobacteria	Actinobacteria	Propionibacteriales	Nocardioidaceae	Nocardioides
OTU1560	Bacteria	Actinobacteria	Actinobacteria	Streptosporangiales	Streptosporangiaceae	Nonomuraea
OTU1562	Bacteria	Firmicutes	Bacilli	Bacillales	Staphylococcaceae	Nosocomiicoccus
OTU1564	Bacteria	Proteobacteria	Alphaproteobacteria	Rhodospirillales	Rhodospirillaceae	Novispirillum
OTU1565	Bacteria	Proteobacteria	Alphaproteobacteria	Sphingomonadales	Sphingomonadaceae	Novosphingobium
OTU1571	Bacteria	Firmicutes	Clostridia	Clostridiales	Clostridiaceae	Oceanirhabdus
OTU1572	Bacteria	Proteobacteria	Gammaproteobacteria	Oceanospirillales	Oceanospirillaceae	Oceaniserpentilla
OTU1573	Bacteria	Deinococcus-Thermus	Deinococci	Thermales	Thermaceae	Oceanithermus
OTU1585	Bacteria	Firmicutes	Bacilli	Bacillales	Bacillaceae	Oceanobacillus
OTU1595	Bacteria	Proteobacteria	Gammaproteobacteria	Oceanospirillales	Oceanospirillaceae	Oceanobacter
OTU1597	Bacteria	Proteobacteria	Gammaproteobacteria	Oceanospirillales	Oceanospirillaceae	Oceanospirillaceae
OTU1600	Bacteria	Proteobacteria	Gammaproteobacteria	Oceanospirillales	Oceanospirillaceae	Oceanospirillum
OTU1602	Bacteria	Proteobacteria	Alphaproteobacteria	Rhizobiales	Brucellaceae	Ochrobactrum
OTU1605	Bacteria	Proteobacteria	Gammaproteobacteria	Oceanospirillales	Oceanospirillaceae	Oleispira
OTU1609	Bacteria	Lentisphaerae	Oligosphaeria	Oligosphaerales	Oligosphaeraceae	Oligosphaera
OTU1610	Bacteria	Actinobacteria	Coriobacteriia	Coriobacteriales	Atopobiaceae	Olsenella
OTU1613	Bacteria	Firmicutes	Clostridia	Halanaerobiales	Halobacteroidaceae	Orenia
OTU1615	Bacteria	Proteobacteria	Alphaproteobacteria	Rickettsiales	Rickettsieae	Orientia
OTU1617	Bacteria	Chloroflexi	Anaerolineae	Anaerolineales	Anaerolineaceae	Ornatilinea
OTU1622	Bacteria	Firmicutes	Bacilli	Bacillales	Bacillaceae	Ornithinibacillus
OTU1624	Bacteria	Actinobacteria	Actinobacteria	Micrococcales	Intrasporangiaceae	Ornithinibacter
OTU1625	Bacteria	Actinobacteria	Actinobacteria	Micrococcales	Intrasporangiaceae	Ornithinimicrobium
OTU1627	Bacteria	Actinobacteria	Actinobacteria	Micrococcales	Intrasporangiaceae	Oryzihumus
OTU1629	Bacteria	Actinobacteria	Actinobacteria	Micrococcales	Intrasporangiaceae	Oryzobacter
OTU1680	Bacteria	Firmicutes	Bacilli	Bacillales	Paenibacillaceae	Paenibacillus
OTU1709	Bacteria	Proteobacteria	Gammaproteobacteria	Enterobacterales	Erwiniaceae	Pantoea
OTU1731	Bacteria	Proteobacteria	Alphaproteobacteria	Rhodobacterales	Rhodobacteraceae	Paracoccus
OTU1737	Bacteria	Firmicutes	Bacilli	Bacillales	Bacillaceae	Paraliobacillus
OTU1741	Bacteria	Proteobacteria	Betaproteobacteria	Burkholderiales	Alcaligenaceae	Parapusillimonas
OTU1743	Bacteria	Proteobacteria	Betaproteobacteria	Burkholderiales	Sutterellaceae	Parasutterella
OTU1745	Bacteria	Firmicutes	Bacilli	Bacillales	Bacillaceae	Paucisalibacillus
OTU1749	Bacteria	Proteobacteria	Gammaproteobacteria	Enterobacterales	Pectobacteriaceae	Pectobacterium
OTU1751	Bacteria	Bacteroidetes	Sphingobacteriia	Sphingobacteriales	Sphingobacteriaceae	Pedobacter
OTU1753	Bacteria	Proteobacteria	Alphaproteobacteria	Rhodospirillales	Rhodospirillaceae	Pelagibius
OTU1754	Bacteria	Verrucomicrobia	Opitutae	Puniceicoccales	Puniceicoccaceae	Pelagicoccus
OTU1757	Bacteria	Firmicutes	Negativicutes	Selenomonadales	Sporomusaceae	Pelosinus
OTU1758	Bacteria	Firmicutes	Clostridia	Clostridiales	Syntrophomonadaceae	Pelospora
OTU1760	Bacteria	Firmicutes	Clostridia	Clostridiales	Peptococcaceae	Pelotomaculum
OTU1768	Bacteria	Firmicutes	Clostridia	Clostridiales	Peptoniphilus	Peptoniphilus
OTU1777	Bacteria	Proteobacteria	Oligoflexia	Bacteriovoracales	Bacteriovoracaceae	Peredibacter
OTU1778	Bacteria	Proteobacteria	Gammaproteobacteria	Arenicellales	Arenicellaceae	Perspicuibacter
OTU1779	Bacteria	Bacteroidetes	Bacteroidia	Bacteroidales	Porphyromonadaceae	Petrimonas
OTU1780	Bacteria	Proteobacteria	Alphaproteobacteria	Rhodospirillales	Rhodospirillaceae	Phaeovibrio
OTU1782	Bacteria	Proteobacteria	Gammaproteobacteria	Enterobacterales	Erwiniaceae	Phaseolibacter
OTU1783	Bacteria	Proteobacteria	Alphaproteobacteria	Caulobacterales	Caulobacteraceae	Phenylobacterium
OTU1786	Bacteria	Bacteroidetes	Bacteroidetes	Bacteroidia	Bacteroidales	Phocaeicola
OTU1789	Bacteria	Proteobacteria	Gammaproteobacteria	Enterobacterales	Morganellaceae	Photorhabdus
OTU1793	Bacteria	Actinobacteria	Actinobacteria	Micrococcales	Intrasporangiaceae	Phycicoccus
OTU1794	Bacteria	Planctomycetes	Phycisphaerae	NA	NA	Phycisphaerae
OTU1795	Bacteria	Proteobacteria	Alphaproteobacteria	Rhizobiales	Phyllobacteriaceae	Phyllobacterium
OTU1796	Bacteria	Actinobacteria	Actinobacteria	Jiangellales	Jiangellaceae	Phytoactinopolyspora
OTU1797	Bacteria	Proteobacteria	Gammaproteobacteria	Enterobacterales	NA	Phytobacter
OTU1798	Bacteria	Actinobacteria	Actinobacteria	Micromonosporales	Micromonosporaceae	Phytomonospora
OTU1799	Bacteria	Firmicutes	Bacilli	Lactobacillales	Enterococcaceae	Pilibacter
OTU1801	Bacteria	Actinobacteria	Actinobacteria	Micrococcales	Dermatophilaceae	Piscicoccus
OTU1802	Bacteria	Proteobacteria	Gammaproteobacteria	Thiotrichales	Piscirickettsiaceae	Piscirickettsia
OTU1803	Bacteria	Actinobacteria	Actinobacteria	Micrococcales	Microbacteriaceae	Planktoluna
OTU1806	Bacteria	Firmicutes	Bacilli	Bacillales	Planococcaceae	Planococcus
OTU1810	Bacteria	Firmicutes	Bacilli	Bacillales	Planococcaceae	Planomicrobium
OTU1815	Bacteria	Proteobacteria	Gammaproteobacteria	NA	CandidatusCompetibacteraceae	Plasticicumulans
OTU1816	Bacteria	Proteobacteria	Alphaproteobacteria	Rhodobacterales	Rhodobacteraceae	Pleomorphobacterium
OTU1817	Bacteria	Proteobacteria	Deltaproteobacteria	Myxococcales	Nannocystaceae	Plesiocystis
OTU1818	Bacteria	Proteobacteria	Gammaproteobacteria	Enterobacterales	NA	Plesiomonas
OTU1819	Bacteria	Proteobacteria	Gammaproteobacteria	Enterobacterales	Enterobacteriaceae	Pluralibacter
OTU1821	Bacteria	Firmicutes	Bacilli	Bacillales	Thermoactinomycetaceae	Polycladomyces
OTU1828	Bacteria	Proteobacteria	Alphaproteobacteria	Sphingomonadales	Erythrobacteraceae	Porphyrobacter
OTU1829	Bacteria	Bacteroidetes	Bacteroidia	Bacteroidales	Porphyromonadaceae	Porphyromonas
OTU1832	Bacteria	Proteobacteria	Gammaproteobacteria	Enterobacterales	Budviciaceae	Pragia
OTU1835	Bacteria	Bacteroidetes	Bacteroidia	Bacteroidales	Prevotellaceae	Prevotella
OTU1838	Bacteria	Proteobacteria	Gammaproteobacteria	Oceanospirillales	Oceanospirillaceae	Profundimonas
OTU1840	Bacteria	Actinobacteria	Actinobacteria	Micrococcales	Promicromonosporaceae	Promicromonospora
OTU1849	Bacteria	Actinobacteria	Actinobacteria	Propionibacteriales	Propionibacteriaceae	Propionibacterium
OTU1854	Bacteria	Actinobacteria	Actinobacteria	Propionibacteriales	Nocardioidaceae	Propionicicella
OTU1855	Bacteria	Actinobacteria	Actinobacteria	Propionibacteriales	Propionibacteriaceae	Propioniciclava
OTU1857	Bacteria	Actinobacteria	Actinobacteria	Propionibacteriales	Propionibacteriaceae	Propioniferax
OTU1858	Bacteria	Actinobacteria	Actinobacteria	Propionibacteriales	Propionibacteriaceae	Propionimicrobium
OTU1860	Bacteria	Firmicutes	Clostridia	Clostridiales	Clostridiaceae	Proteiniclasticum
OTU1861	Bacteria	Proteobacteria	Gammaproteobacteria	NA	NA	proteobacterium
OTU1862	Bacteria	Proteobacteria	Gammaproteobacteria	Enterobacterales	Morganellaceae	Proteocatella
OTU1864	Bacteria	Proteobacteria	Gammaproteobacteria	Enterobacterales	Morganellaceae	Proteus
OTU1869	Bacteria	Proteobacteria	Gammaproteobacteria	Enterobacterales	Morganellaceae	Providencia
OTU1874	Bacteria	Proteobacteria	Gammaproteobacteria	Alteromonadales	Pseudoalteromonadaceae	Pseudoalteromonas
OTU1880	Bacteria	Firmicutes	Clostridia	Clostridiales	Hungateiclostridiaceae	Pseudobacteroides
OTU1883	Bacteria	Actinobacteria	Actinobacteria	Micrococcales	Microbacteriaceae	Pseudoclavibacter
OTU1888	Bacteria	Firmicutes	Bacilli	Bacillales	Bacillaceae	Pseudogracilibacillus
OTU1889	Bacteria	Actinobacteria	Actinobacteria	Kineosporiales	Kineosporiaceae	Pseudokineococcus
OTU1890	Bacteria	Proteobacteria	Gammaproteobacteria	Pseudomonadales	Pseudomonadaceae	Pseudomonadaceae
OTU1893	Bacteria	Proteobacteria	Gammaproteobacteria	Pseudomonadales	Pseudomonadaceae	Pseudomonas
OTU1959	Bacteria	Actinobacteria	Actinobacteria	Pseudonocardiales	Pseudonocardiaceae	Pseudonocardia
OTU1961	Bacteria	Bacteroidetes	Sphingobacteriia	Sphingobacteriales	Sphingobacteriaceae	Pseudorhodobacter
OTU1962	Bacteria	Proteobacteria	Gammaproteobacteria	Oceanospirillales	Oceanospirillaceae	Pseudospirillum
OTU1963	Bacteria	Proteobacteria	Gammaproteobacteria	Xanthomonadales	Xanthomonadaceae	Pseudoxanthomonas
OTU1971	Bacteria	Proteobacteria	Gammaproteobacteria	Pseudomonadales	Moraxellaceae	Psychrobacter
OTU1976	Bacteria	Proteobacteria	Gammaproteobacteria	Alteromonadales	Psychromonadaceae	Psychromonas
OTU1980	Bacteria	Firmicutes	Bacilli	Bacillales	Sporolactobacillaceae	Pullulanibacillus
OTU1983	Bacteria	Proteobacteria	Betaproteobacteria	Burkholderiales	Alcaligenaceae	Pusillimonas
OTU1986	Bacteria	Actinobacteria	Actinobacteria	Kineosporiales	Kineosporiaceae	Quadrisphaera
OTU1987	Bacteria	Proteobacteria	Betaproteobacteria	Burkholderiales	Burkholderiaceae	Ralstonia
OTU1991	Bacteria	Proteobacteria	Gammaproteobacteria	Enterobacterales	Enterobacteriaceae	Raoultella
OTU1992	Bacteria	Actinobacteria	Coriobacteriia	Eggerthellales	Eggerthellaceae	Raoultibacter
OTU1994	Bacteria	Actinobacteria	Actinobacteria	Micrococcales	Rarobacteraceae	Rarobacter
OTU1995	Bacteria	Actinobacteria	Actinobacteria	Micrococcales	Microbacteriaceae	Rathayibacter
OTU1996	Bacteria	Proteobacteria	Gammaproteobacteria	Oceanospirillales	Saccharospirillaceae	Reinekea
OTU2000	Bacteria	Proteobacteria	Gammaproteobacteria	Chromatiales	Chromatiaceae	Rheinheimera
OTU2003	Bacteria	Proteobacteria	Alphaproteobacteria	Rhizobiales	Rhizobiaceae	Rhizobium
OTU2006	Bacteria	Proteobacteria	Alphaproteobacteria	Rhodobacterales	Rhodobacteraceae	Rhodobacter
OTU2008	Bacteria	Actinobacteria	Actinobacteria	Corynebacteriales	Nocardiaceae	Rhodococcus
OTU2010	Bacteria	Actinobacteria	Actinobacteria	Micrococcales	Microbacteriaceae	Rhodoglobus
OTU2011	Bacteria	Proteobacteria	Alphaproteobacteria	Rhizobiales	Rhodobiaceae	Rhodoligotrophos
OTU2015	Bacteria	Proteobacteria	Alphaproteobacteria	Rhodospirillales	Rhodospirillaceae	Rhodospirillaceae
OTU2018	Bacteria	Firmicutes	Clostridia	Clostridiales	Lachnospiraceae	Roseburia
OTU2021	Bacteria	Proteobacteria	Alphaproteobacteria	Rhodospirillales	Acetobacteraceae	Roseomonas
OTU2025	Bacteria	Actinobacteria	Actinobacteria	Micrococcales	Micrococcaceae	Rothia
OTU2030	Bacteria	Actinobacteria	Actinobacteria	Micrococcales	Ruaniaceae	Ruania
OTU2033	Bacteria	Proteobacteria	Alphaproteobacteria	Rhodobacterales	Rhodobacteraceae	Rubribacterium
OTU2034	Bacteria	Proteobacteria	Alphaproteobacteria	Rhodobacterales	Rhodobacteraceae	Rubrimonas
OTU2035	Bacteria	Actinobacteria	Rubrobacteria	Rubrobacterales	Rubrobacteraceae	Rubrobacter
OTU2038	Bacteria	Proteobacteria	Gammaproteobacteria	Aeromonadales	Succinivibrionaceae	Ruminobacter
OTU2044	Bacteria	Firmicutes	Bacilli	Bacillales	Paenibacillaceae	Saccharibacillus
OTU2045	Bacteria	Firmicutes	Bacilli	Bacillales	Bacillaceae	Saccharococcus
OTU2046	Bacteria	Actinobacteria	Actinobacteria	Pseudonocardiales	Pseudonocardiaceae	Saccharomonospora
OTU2052	Bacteria	Actinobacteria	Actinobacteria	Pseudonocardiales	Pseudonocardiaceae	Saccharopolyspora
OTU2054	Bacteria	Proteobacteria	Gammaproteobacteria	Oceanospirillales	Saccharospirillaceae	Saccharospirillum
OTU2055	Bacteria	Actinobacteria	Actinobacteria	Pseudonocardiales	Pseudonocardiaceae	Saccharothrix
OTU2056	Bacteria	Actinobacteria	Actinobacteria	Micrococcales	Beutenbergiaceae	Salana
OTU2057	Bacteria	Firmicutes	Bacilli	Bacillales	Bacillaceae	Salimicrobium
OTU2059	Bacteria	Firmicutes	Bacilli	Bacillales	Bacillaceae	Salinibacillus
OTU2065	Bacteria	Firmicutes	Bacilli	Bacillales	Staphylococcaceae	Salinicoccus
OTU2070	Bacteria	Proteobacteria	Gammaproteobacteria	Alteromonadales	Alteromonadaceae	Salinimonas
OTU2073	Bacteria	Firmicutes	Bacilli	Bacillales	Bacillaceae	Salirhabdus
OTU2074	Bacteria	Firmicutes	Bacilli	Bacillales	Bacillaceae	Saliterribacillus
OTU2076	Bacteria	Proteobacteria	Gammaproteobacteria	Enterobacterales	Enterobacteriaceae	Salmonella
OTU2081	Bacteria	Firmicutes	Bacilli	Bacillales	Bacillaceae	Salsuginibacillus
OTU2082	Bacteria	Proteobacteria	Gammaproteobacteria	Enterobacterales	Yersiniaceae	Samsonia
OTU2083	Bacteria	Proteobacteria	Alphaproteobacteria	Sphingomonadales	Sphingomonadaceae	Sandaracinobacter
OTU2084	Bacteria	Proteobacteria	Myxococcales	Sorangiineae	Sandaracinaceae	Sandaracinus
OTU2085	Bacteria	Actinobacteria	Actinobacteria	Micrococcales	Sanguibacteraceae	Sanguibacter
OTU2089	Bacteria	Chlorophyta	Chlorophyceae	Sphaeropleales	Scenedesmaceae	Scenedesmus
OTU2091	Bacteria	Planctomycetes	Planctomycetia	Planctomycetales	Planctomycetaceae	Schlesneria
OTU2092	Bacteria	Firmicutes	Negativicutes	Selenomonadales	Selenomonadaceae	Schwartzia
OTU2093	Bacteria	Firmicutes	Bacilli	Bacillales	Sporolactobacillaceae	Scopulibacillus
OTU2099	Bacteria	Firmicutes	Bacilli	Bacillales	Thermoactinomycetaceae	Seinonella
OTU2100	Bacteria	Firmicutes	Negativicutes	Selenomonadales	Selenomonadaceae	Selenomonas
OTU2104	Bacteria	Firmicutes	Clostridia	Clostridiales	Clostridiaceae	Senegalia
OTU2105	Bacteria	Actinobacteria	Actinobacteria	Micrococcales	Beutenbergiaceae	Serinibacter
OTU2107	Bacteria	Actinobacteria	Actinobacteria	Micrococcales	Intrasporangiaceae	Serinicoccus
OTU2111	Bacteria	Proteobacteria	Gammaproteobacteria	Enterobacterales	Yersiniaceae	Serratia
OTU2117	Bacteria	Proteobacteria	Gammaproteobacteria	Alteromonadales	Shewanellaceae	Shewanella
OTU2124	Bacteria	Firmicutes	Bacilli	Bacillales	Thermoactinomycetaceae	Shimazuella
OTU2125	Bacteria	Proteobacteria	Gammaproteobacteria	Enterobacterales	Enterobacteriaceae	Shimwellia
OTU2126	Bacteria	Firmicutes	Clostridia	Clostridiales	Lachnospiraceae	Shuttleworthia
OTU2127	Bacteria	Proteobacteria	Alphaproteobacteria	Rhodobacterales	Rhodobacteraceae	Siccibacter
OTU2129	Bacteria	Actinobacteria	Actinobacteria	Micrococcales	Micrococcaceae	Sinomonas
OTU2133	Bacteria	Actinobacteria	Actinobacteria	Corynebacteriales	Gordoniaceae	Skermania
OTU2136	Bacteria	Proteobacteria	Gammaproteobacteria	Enterobacterales	Pectobacteriaceae	Sodalis
OTU2141	Bacteria	Proteobacteria	Alphaproteobacteria	Sphingomonadales	Sphingomonadaceae	Sphingobium
OTU2144	Bacteria	Proteobacteria	Alphaproteobacteria	Sphingomonadales	Sphingomonadaceae	Sphingomicrobium
OTU2147	Bacteria	Proteobacteria	Alphaproteobacteria	Sphingomonadales	Sphingomonadaceae	Sphingomonas
OTU2151	Bacteria	Proteobacteria	Gammaproteobacteria	Chromatiales	Ectothiorhodospiraceae	Spiribacter
OTU2152	Bacteria	Actinobacteria	Actinobacteria	Micromonosporales	Micromonosporaceae	Spirilliplanes
OTU2153	Bacteria	Spirochaetes	Spirochaetia	Spirochaetales	Spirochaetaceae	Spirochaeta
OTU2154	Bacteria	Tenericutes	Mollicutes	Entomoplasmatales	Spiroplasmataceae	Spiroplasma
OTU2156	Bacteria	Proteobacteria	Gammaproteobacteria	Oceanospirillales	Oceanospirillaceae	Spongiispira
OTU2158	Bacteria	Actinobacteria	Actinobacteria	Sporichthyales	Sporichthyaceae	Sporichthya
OTU2162	Bacteria	Firmicutes	Bacilli	Bacillales	Sporolactobacillaceae	Sporolactobacillus
OTU2163	Bacteria	Firmicutes	Negativicutes	Selenomonadales	Sporomusaceae	Sporomusa
OTU2165	Bacteria	Firmicutes	Bacilli	Bacillales	Planococcaceae	Sporosarcina
OTU2172	Bacteria	Firmicutes	Bacilli	Bacillales	Staphylococcaceae	Staphylococcus
OTU2201	Bacteria	Proteobacteria	Gammaproteobacteria	Xanthomonadales	Xanthomonadaceae	Stenotrophomonas
OTU2203	Bacteria	Proteobacteria	Gammaproteobacteria	Nevskiales	Sinobacteraceae	Steroidobacter
OTU2218	Bacteria	Firmicutes	Bacilli	Lactobacillales	Streptococcaceae	Streptococcus
OTU2243	Bacteria	Actinobacteria	Actinobacteria	Actinomycetales	Streptomycetaceae	Streptomyces
OTU2267	Bacteria	Actinobacteria	Actinobacteria	Streptosporangiales	Streptosporangiaceae	Streptosporangium
OTU2271	Bacteria	Proteobacteria	Gammaproteobacteria	Aeromonadales	Succinivibrionaceae	Succinatimonas
OTU2272	Bacteria	Proteobacteria	Gammaproteobacteria	Aeromonadales	Succinivibrionaceae	Succinimonas
OTU2274	Bacteria	Proteobacteria	Gammaproteobacteria	Aeromonadales	Succinivibrionaceae	Succinivibrio
OTU2276	Bacteria	Proteobacteria	Gammaproteobacteria	Thiotrichales	Piscirickettsiaceae	Sulfurivirga
OTU2283	Bacteria	Cyanobacteria	NA	Synechococcales	Synechococcaceae	Synechococcus
OTU2285	Bacteria	Firmicutes	Clostridia	Thermoanaerobacterales	ThermoanaerobacteralesFamilyIII	Syntrophaceticus
OTU2286	Bacteria	Firmicutes	Clostridia	Clostridiales	Peptococcaceae	Syntrophobotulus
OTU2289	Bacteria	Proteobacteria	Deltaproteobacteria	Syntrophobacterales	Syntrophorhabdaceae	Syntrophorhabdus
OTU2291	Bacteria	Proteobacteria	Gammaproteobacteria	Enterobacterales	Erwiniaceae	Tatumella
OTU2295	Bacteria	Firmicutes	Bacilli	Bacillales	Bacillaceae	Tepidibacillus
OTU2296	Bacteria	Proteobacteria	Alphaproteobacteria	Rhizobiales	Rhodobiaceae	Tepidicaulis
OTU2297	Bacteria	Proteobacteria	Gammaproteobacteria	Oceanospirillales	NA	Terasakiispira
OTU2298	Bacteria	Proteobacteria	Gammaproteobacteria	CellVibrionales	Cellvibrionaceae	Teredinibacter
OTU2299	Bacteria	Firmicutes	Bacilli	Bacillales	Bacillaceae	Terribacillus
OTU2302	Bacteria	Actinobacteria	Actinobacteria	Micrococcales	Micrococcaceae	Tersicoccus
OTU2306	Bacteria	Actinobacteria	Actinobacteria	Propionibacteriales	Propionibacteriaceae	Tessaracoccus
OTU2310	Bacteria	Firmicutes	Bacilli	Lactobacillales	Enterococcaceae	Tetragenococcus
OTU2314	Bacteria	Actinobacteria	Actinobacteria	Micrococcales	Intrasporangiaceae	Tetrasphaera
OTU2319	Bacteria	Actinobacteria	Actinobacteria	Kineosporiales	Kineosporiaceae	Thalassiella
OTU2320	Bacteria	Firmicutes	Bacilli	Bacillales	Bacillaceae	Thalassobacillus
OTU2322	Bacteria	Proteobacteria	Alphaproteobacteria	Rhodospirillales	Rhodospirillaceae	Thalassobaculum
OTU2324	Bacteria	Proteobacteria	Gammaproteobacteria	Oceanospirillales	Oceanospirillaceae	Thalassolituus
OTU2325	Bacteria	Proteobacteria	Alphaproteobacteria	Rhodospirillales	Rhodospirillaceae	Thalassospira
OTU2329	Bacteria	Chloroflexi	Anaerolineae	Anaerolineales	Anaerolineaceae	Thermanaerothrix
OTU2330	Bacteria	Actinobacteria	Actinobacteria	Propionibacteriales	Nocardioidaceae	Thermasporomyces
OTU2331	Bacteria	Firmicutes	Bacilli	Bacillales	BacillalesFamilyX.IncertaeSedis	Thermicanus
OTU2333	Bacteria	Firmicutes	Clostridia	Clostridiales	Peptococcaceae	Thermincola
OTU2335	Bacteria	Firmicutes	Clostridia	Thermoanaerobacterales	Thermoanaerobacteraceae	Thermoanaerobacter
OTU2340	Bacteria	Acidobacteria	Thermoanaerobaculia	Thermoanaerobaculales	Thermoanaerobaculaceae	Thermoanaerobaculum
OTU2341	Bacteria	Proteobacteria	Gammaproteobacteria	Chromatiales	Chromatiaceae	Thermochromatium
OTU2342	Bacteria	Firmicutes	Clostridia	Thermoanaerobacterales	Thermodesulfobiaceae	Thermodesulfobium
OTU2343	Bacteria	Nitrospirae	Nitrospira	Nitrospirales	Nitrospiraceae	Thermodesulfovibrio
OTU2345	Bacteria	Chloroflexi	Thermoflexia	Thermoflexales	Thermoflexaceae	Thermoflexus
OTU2346	Bacteria	Firmicutes	Clostridia	Clostridiales	Clostridiaceae	Thermohalobacter
OTU2347	Bacteria	Actinobacteria	Thermoleophilia	Thermoleophilales	Thermoleophilaceae	Thermoleophilum
OTU2348	Bacteria	Firmicutes	Bacilli	Bacillales	Bacillaceae	Thermolongibacillus
OTU2351	Bacteria	Proteobacteria	Gammaproteobacteria	Xanthomonadales	Xanthomonadaceae	Thermomonas
OTU2353	Bacteria	Actinobacteria	Actinobacteria	Streptosporangiales	Thermomonosporaceae	Thermomonospora
OTU2354	Bacteria	Bacteroidetes	Cytophagia	Cytophagales	Thermonemataceae	Thermonema
OTU2356	Bacteria	Firmicutes	Clostridia	Clostridiales	Syntrophomonadaceae	Thermosyntropha
OTU2358	Bacteria	Synergistetes	Synergistia	Synergistales	Synergistaceae	Thermovirga
OTU2360	Bacteria	Proteobacteria	Gammaproteobacteria	Thiotrichales	Piscirickettsiaceae	Thioalkalimicrobium
OTU2361	Bacteria	Proteobacteria	Gammaproteobacteria	Chromatiales	Thioalkalispiraceae	Thioalkalispira
OTU2362	Bacteria	Proteobacteria	Gammaproteobacteria	Chromatiales	Ectothiorhodospiraceae	Thioalkalivibrio
OTU2368	Bacteria	Proteobacteria	Gammaproteobacteria	Chromatiales	Halothiobacillaceae	Thiofaba
OTU2371	Bacteria	Proteobacteria	Gammaproteobacteria	Chromatiales	Chromatiaceae	Thiohalocapsa
OTU2373	Bacteria	Proteobacteria	Gammaproteobacteria	Chromatiales	Ectothiorhodospiraceae	Thiohalomonas
OTU2375	Bacteria	Proteobacteria	Gammaproteobacteria	NA	NA	Thiohalorhabdus
OTU2377	Bacteria	Proteobacteria	Gammaproteobacteria	Chromatiales	Chromatiaceae	Thiolamprovum
OTU2378	Bacteria	Proteobacteria	Gammaproteobacteria	NA	NA	Thiolapillus
OTU2380	Bacteria	Proteobacteria	Betaproteobacteria	Burkholderiales	NA	Thiomonas
OTU2381	Bacteria	Proteobacteria	Gammaproteobacteria	Chromatiales	Chromatiaceae	Thiophaeococcus
OTU2382	Bacteria	Proteobacteria	Gammaproteobacteria	Chromatiales	Chromatiaceae	Thiorhodococcus
OTU2384	Bacteria	Proteobacteria	Gammaproteobacteria	Thiotrichales	Thiotrichaceae	Thiothrix
OTU2388	Bacteria	Actinobacteria	Actinobacteria	Corynebacteriales	NA	Tomitella
OTU2390	Bacteria	Spirochaetes	Spirochaetia	Spirochaetales	Spirochaetaceae	Treponema
OTU2394	Bacteria	Firmicutes	Bacilli	Lactobacillales	Carnobacteriaceae	Trichococcus
OTU2396	Bacteria	Firmicutes	Actinobacteria	Micrococcales	NA	Tropheryma
OTU2398	Bacteria	Firmicutes	Bacilli	Bacillales	Sporolactobacillaceae	Tuberibacillus
OTU2399	Bacteria	Actinobacteria	Actinobacteria	Corynebacteriales	Corynebacteriaceae	Turicella
OTU2401	Bacteria	Proteobacteria	Gammaproteobacteria	CellVibrionales	Cellvibrionaceae	Umboniibacter
OTU2403	Bacteria	Actinobacteria	Actinobacteria	Pseudonocardiales	Pseudonocardiaceae	Umezawaea
OTU2495	Bacteria	Firmicutes	Bacilli	Bacillales	Planococcaceae	Ureibacillus
OTU2498	Bacteria	Firmicutes	Bacilli	Lactobacillales	Vagococcus	Vagococcus
OTU2500	Bacteria	Candidatus Melainabacteria	NA	VampiroVibrionales	NA	Vampirovibrio
OTU2504	Bacteria	Verrucomicrobia	Verrucomicrobiae	Verrucomicrobiales	NA	Verrucomicrobiales
OTU2506	Bacteria	Actinobacteria	Actinobacteria	Micromonosporales	Micromonosporaceae	Verrucosispora
OTU2515	Bacteria	Proteobacteria	Gammaproteobacteria	Vibrionales	Vibrionaceae	Vibrio
OTU2529	Bacteria	Firmicutes	Bacilli	Bacillales	Bacillaceae	Virgibacillus
OTU2540	Bacteria	Proteobacteria	Betaproteobacteria	Neisseriales	Neisseriaceae	Vitreoscilla
OTU2542	Bacteria	Firmicutes	Bacilli	Bacillales	Bacillaceae	Vulcanibacillus
OTU2543	Bacteria	Firmicutes	Bacilli	Bacillales	Bacillaceae	Vulcaniibacterium
OTU2544	Bacteria	Proteobacteria	Myxococcales	Cystobacterineae	Vulgatibacteraceae	Vulgatibacter
OTU2545	Bacteria	Firmicutes	Bacilli	Lactobacillales	Leuconostocaceae	Weissella
OTU2546	Bacteria	Proteobacteria	Gammaproteobacteria	Chromatiales	Woeseiaceae	Woeseia
OTU2548	Bacteria	Proteobacteria	Gammaproteobacteria	Xanthomonadales	Xanthomonadaceae	Xanthomonas
OTU2550	Bacteria	Proteobacteria	Gammaproteobacteria	Enterobacterales	Morganellaceae	Xenorhabdus
OTU2553	Bacteria	Actinobacteria	Actinobacteria	Micromonosporales	Micromonosporaceae	Xiangella
OTU2555	Bacteria	Proteobacteria	Gammaproteobacteria	Enterobacterales	Yersiniaceae	Yersinia
OTU2556	Bacteria	Actinobacteria	Actinobacteria	Micrococcales	Dermacoccaceae	Yimella
OTU2558	Bacteria	Actinobacteria	Actinobacteria	Pseudonocardiales	Pseudonocardiaceae	Yuhushiella
OTU2560	Bacteria	Actinobacteria	Actinobacteria	Micrococcales	Micrococcaceae	Zhihengliuella
OTU2564	Bacteria	Actinobacteria	Actinobacteria	Micrococcales	Microbacteriaceae	Zimmermannella
OTU2567	Bacteria	Proteobacteria	Gammaproteobacteria	Aeromonadales	Aeromonadaceae	Zobellella
OTU2569	Bacteria	Proteobacteria	Gammaproteobacteria	Oceanospirillales	Halomonadaceae	Zymobacter
